# Supplementary material for: Association of the systemic immune-inflammation index with all-cause mortality in patients with arteriosclerotic cardiovascular disease
Source: PubMed Central journal article supplement (PMC9510918; doi:10.3389/fcvm.2022.952953), 2022-09-12
Supplement: Data_Sheet_1.pdf [file Data_Sheet_1.pdf]

Table S1 Sensitivity analyses after excluding patients who died within 2 years of follow up

|                            | Non-adjusted              | Adjust I                 | Adjust II                |
|----------------------------|---------------------------|--------------------------|--------------------------|
| SII ln transform           | 1.31 (1.16, 1.47) <0.0001 | 1.18 (1.03, 1.35) 0.0176 | 1.15 (1.00, 1.33) 0.0453 |
| SII ln transform quartiles |                           |                          |                          |
| Q1                         | 1.0(Reference)            | 1.0(Reference)           | 1.0(Reference)           |
| Q2                         | 1.08 (0.90, 1.31) 0.4065  | 1.04 (0.84, 1.29) 0.7443 | 1.08 (0.87, 1.35) 0.4930 |
| Q3                         | 1.16 (0.96, 1.40) 0.1349  | 1.01 (0.82, 1.26) 0.8946 | 1.06 (0.85, 1.32) 0.6292 |
| Q4                         | 1.62 (1.35, 1.94) <0.0001 | 1.37 (1.11, 1.68) 0.0035 | 1.34 (1.08, 1.66) 0.0085 |
| P for trend                | < 0.001                   | 0.019                    | 0.038                    |

Non-adjusted model adjust for: None

Adjust I model adjust for: sex, age, BMI, ethnicity, waist circumference, education level, marital status, and family poverty income ratio;

Adjust II model adjust for: sex, age, BMI, ethnicity, waist circumference, education level, marital status, family poverty income ratio, alcohol user, smoke, malignancy, stroke, asthma, diabetes, hypertension, albumin, eGFR, ALT, AST, total cholesterol, HbA1c, HDL cholesterol, creatinine, and uric acid.

Table S2 Sensitivity analyses after excluding patients with any cancers at baseline

|                            | Non-adjusted           | Adjust I               | Adjust II              |
|----------------------------|------------------------|------------------------|------------------------|
| SII ln transform           | 1.4 (1.2, 1.6) <0.001  | 1.2 (1.1, 1.4) 0.005   | 1.2 (1.0, 1.4) 0.014   |
| SII ln transform quartiles |                        |                        |                        |
| Q1                         | 1.0                    | 1.0                    | 1.0                    |
| Q2                         | 1.0 (0.8, 1.2) 0.912   | 1.0 (0.8, 1.3) 0.945   | 1.1 (0.9, 1.4) 0.413   |
| Q3                         | 1.1 (0.9, 1.3) 0.373   | 1.0 (0.8, 1.2) 0.752   | 1.0 (0.8, 1.3) 0.819   |
| Q4                         | 1.7 (1.4, 2.0) < 0.001 | 1.5 (1.2, 1.8) < 0.001 | 1.5 (1.2, 1.9) < 0.001 |
| P for trend                | < 0.001                | < 0.001                | < 0.001                |

Non-adjusted model adjust for: None

Adjust I model adjust for: sex, age, BMI, ethnicity, waist circumference, education level, marital status, and family poverty income ratio;

Adjust II model adjust for: sex, age, BMI, ethnicity, waist circumference, education level, marital status, family poverty income ratio, alcohol user, smoke, stroke, asthma, diabetes, hypertension, albumin, eGFR, ALT, AST, total cholesterol, HbA1c, HDL cholesterol, creatinine, and uric acid.

Table S3 Sensitivity analyses further adjust for main class of drugs (statins, beta blockers, antiplatelet) in individuals with ASCVD

|                            | Non-adjusted              | Adjust I                  | Adjust II                 |
|----------------------------|---------------------------|---------------------------|---------------------------|
| SII ln transform           | 1.42 (1.28, 1.57) <0.0001 | 1.27 (1.12, 1.43) 0.0002  | 1.23 (1.10, 1.38) 0.0003  |
| SII ln transform quartiles |                           |                           |                           |
| Q1                         | 1.0(Reference)            | 1.0(Reference)            | 1.0(Reference)            |
| Q2                         | 1.02 (0.86, 1.22) 0.7931  | 1.00 (0.81, 1.22) 0.9707  | 1.05 (0.86, 1.27) 0.6515  |
| Q3                         | 1.11 (0.93, 1.32) 0.2479  | 1.00 (0.82, 1.22) 0.9861  | 1.05 (0.86, 1.27) 0.6392  |
| Q4                         | 1.76 (1.50, 2.08) <0.0001 | 1.49 (1.23, 1.81) <0.0001 | 1.45 (1.21, 1.74) <0.0001 |
| P for trend                | <0.001                    | <0.001                    | <0.001                    |

Non-adjusted model adjust for: None

Adjust I model adjust for: sex, age, BMI, ethnicity, waist circumference, education level, marital status, and family poverty income ratio;

Adjust II model adjust for: sex, age, BMI, ethnicity, waist circumference, education level, marital status, family poverty income ratio, alcohol user, smoke, malignancy, stroke, asthma, diabetes, hypertension, albumin, eGFR, ALT, AST, total cholesterol, HbA1c, HDL cholesterol, creatinine, uric acid, and main class of drugs (statins, beta blockers, antiplatelet).
